# Supplementary material
Source: PubMed Central journal article supplement (PMC1360561)

anti-Phage

Nucleus

anti- $\beta$ 1 Integrin

Merge

fd-tet  
PhageAu-fd-tet  
NetworkAu-fd-tet-imid  
Network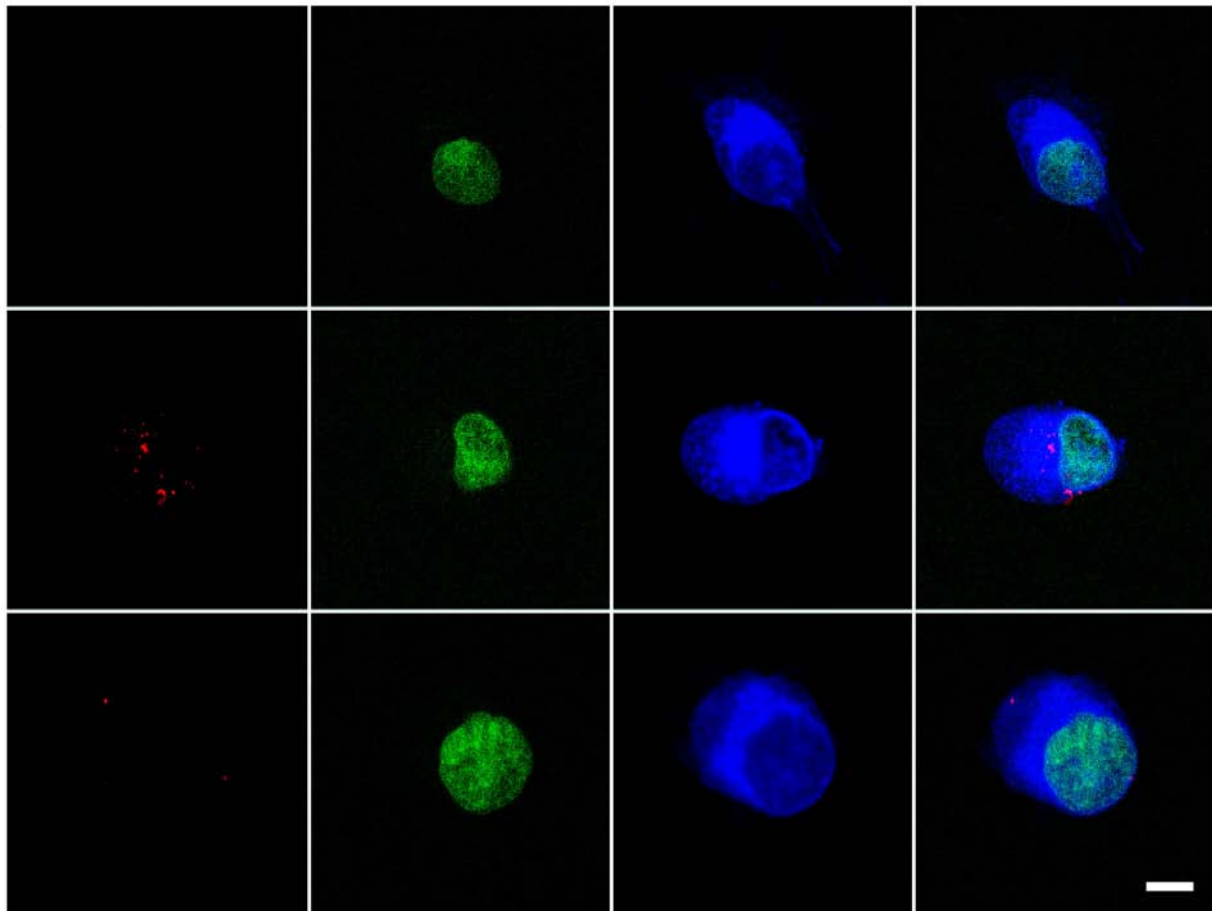

Supplement: pnas_0509739103_1.pdf [file pnas_0509739103_1.pdf]
